# Supplementary material for: Sequentially inducible mouse models reveal that Npm1 mutation causes malignant transformation of Dnmt3a-mutant clonal hematopoiesis
Source: PubMed Central journal article supplement (PMC6609470; doi:10.1038/s41375-018-0368-6), 2019-01-28
Supplement: NIHMS1516722-supplement-1.pdf [file NIHMS1516722-supplement-1.pdf]

# Change of authorship request form (pre-acceptance)

## Please read the important information on page 4 before you begin

This form should be used by authors to request any change in authorship including changes in corresponding authors. Please fully complete all sections. Use black ink and block capitals and provide each author's full name with the given name first followed by the family name.

Please note: In author collaborations where there is formal agreement for representing the collaboration, it is sufficient for the representative or legal guarantor (usually the corresponding author) to complete and sign the Authorship Change Form on behalf of all authors.

### Section 1: Please provide the current title of manuscript

(For journals: Please provide the manuscript ID, title and/or DOI if available.)

(For books: Please provide the title, ISBN and/or DOI if available.)

|                                                             |              |
|-------------------------------------------------------------|--------------|
| <b>Manuscript ID no. in case of unpublished manuscript:</b> | 18-LEU-1304R |
| <b>DOI in case of published manuscript:</b>                 |              |
| <b>ISBN (for books):</b>                                    |              |

Title: SEQUENTIALLY INDUCIBLE MOUSE MODELS REVEAL THAT NPM1 MUTATION CAUSES MALIGNANT TRANSFORMATION OF DNMT3A-MUTANT CLONAL HEMATOPOIESIS

### Section 2: Please provide the previous authorship, in the order shown on the manuscript before the changes were introduced. Please indicate the corresponding author by adding (CA) behind the name.

|                        | First name(s) | Family name | ORCID or SCOPUS id, if available |
|------------------------|---------------|-------------|----------------------------------|
| 1 <sup>st</sup> author | MATTHEW A.    | LOBERG      |                                  |
| 2 <sup>nd</sup> author | REBECCA K.    | BELL        |                                  |
| 3 <sup>rd</sup> author | LESLIE O.     | GOODWIN     |                                  |
| 4 <sup>th</sup> author | ELIZABETH     | EUDY        |                                  |
| 5 <sup>th</sup> author | JENNIFER M.   | SANMIGUEL   |                                  |
| 6 <sup>th</sup> author | KIRA          | YOUNG       |                                  |
| 7 <sup>th</sup> author | DAVID E.      | BERGSTROM   |                                  |

Please use an additional sheet if there are more than 7 authors.

# Change of authorship request form (pre-acceptance)

## Please read the important information on page 4 before you begin

This form should be used by authors to request any change in authorship including changes in corresponding authors. Please fully complete all sections. Use black ink and block capitals and provide each author's full name with the given name first followed by the family name.

Please note: In author collaborations where there is formal agreement for representing the collaboration, it is sufficient for the representative or legal guarantor (usually the corresponding author) to complete and sign the Authorship Change Form on behalf of all authors.

**Section 1: Please provide the current title of manuscript**  
 (For journals: Please provide the manuscript ID, title and/or DOI if available.)  
 (For books: Please provide the title, ISBN and/or DOI if available.)

|                                                             |              |
|-------------------------------------------------------------|--------------|
| <b>Manuscript ID no. in case of unpublished manuscript:</b> | 18-LEU-1304R |
| <b>DOI in case of published manuscript:</b>                 |              |
| <b>ISBN (for books):</b>                                    |              |

Title: SEQUENTIALLY INDUCIBLE MOUSE MODELS REVEAL THAT NPM1 MUTATION CAUSES MALIGNANT TRANSFORMATION OF DNMT3A-MUTANT CLONAL HEMATOPOIESIS

**Section 2: Please provide the previous authorship, in the order shown on the manuscript before the changes were introduced. Please indicate the corresponding author by adding (CA) behind the name.**

|                                                | First name(s) | Family name | ORCID or SCOPUS id, if available |
|------------------------------------------------|---------------|-------------|----------------------------------|
| 8 <sup>th</sup><br>9 <sup>th</sup><br>X author | REBEKKA K.    | SCHNEIDER   |                                  |
| X author                                       | JENNIFER J.   | TROWBRIDGE  |                                  |
| 3 <sup>rd</sup> author                         |               |             |                                  |
| 4 <sup>th</sup> author                         |               |             |                                  |
| 5 <sup>th</sup> author                         |               |             |                                  |
| 6 <sup>th</sup> author                         |               |             |                                  |
| 7 <sup>th</sup> author                         |               |             |                                  |

Please use an additional sheet if there are more than 7 authors.

## Change of authorship request form (pre-acceptance)

**Section 3: Please provide a justification for change. Please use this section to explain your reasons for changing the authorship of your manuscript, e.g. what necessitated the change in authorship? Please refer to the (journal) policy pages for more information about authorship. Please explain why omitted authors were not originally included and/or why authors were removed on the submitted manuscript.**

THE AUTHORSHIP NOW INCLUDES LINDE MILES AND ROSS LEVINE, WHO WERE KEY COLLABORATORS ON EXPERIMENTS REQUESTED BY REFEREES DURING MANUSCRIPT REVISION. THEY WERE NOT ORIGINALLY INCLUDED AS THEY DID NOT CONTRIBUTE TO THE EXPERIMENTS ORIGINALLY PRESENTED IN THE MANUSCRIPT.

**Section 4: Proposed new authorship. Please provide your new authorship list in the order you would like it to appear on the manuscript. Please indicate the corresponding author by adding (CA) behind the name. If the corresponding author has changed, please indicate the reason under section 3.**

|                        | First name(s) | Family name (this name will appear in full on the final publication and will be searchable in various abstract and indexing databases) |
|------------------------|---------------|----------------------------------------------------------------------------------------------------------------------------------------|
| 1 <sup>st</sup> author | MATTHEW A.    | LOBERG                                                                                                                                 |
| 2 <sup>nd</sup> author | REBECCA K.    | BELL                                                                                                                                   |
| 3 <sup>rd</sup> author | LESLIE O.     | GOODWIN                                                                                                                                |
| 4 <sup>th</sup> author | ELIZABETH     | EUDY                                                                                                                                   |
| 5 <sup>th</sup> author | LINDE A.      | MILES                                                                                                                                  |
| 6 <sup>th</sup> author | JENNIFER M.   | SANMIGUEL                                                                                                                              |
| 7 <sup>th</sup> author | KIRA          | YOUNG                                                                                                                                  |

Please use an additional sheet if there are more than 7 authors.



## Change of authorship request form (pre-acceptance)

**Section 3: Please provide a justification for change. Please use this section to explain your reasons for changing the authorship of your manuscript, e.g. what necessitated the change in authorship? Please refer to the (journal) policy pages for more information about authorship. Please explain why omitted authors were not originally included and/or why authors were removed on the submitted manuscript.**

THE AUTHORSHIP NOW INCLUDES LINDE MILES AND ROSS LEVINE, WHO WERE KEY COLLABORATORS ON EXPERIMENTS REQUESTED BY REFEREES DURING MANUSCRIPT REVISION. THEY WERE NOT ORIGINALLY INCLUDED AS THEY DID NOT CONTRIBUTE TO THE EXPERIMENTS PRESENTED IN ORIGINAL VERSION OF THE MANUSCRIPT.

**Section 4: Proposed new authorship. Please provide your new authorship list in the order you would like it to appear on the manuscript. Please indicate the corresponding author by adding (CA) behind the name. If the corresponding author has changed, please indicate the reason under section 3.**

|                                                             | First name(s) | Family name (this name will appear in full on the final publication and will be searchable in various abstract and indexing databases) |
|-------------------------------------------------------------|---------------|----------------------------------------------------------------------------------------------------------------------------------------|
| 8 <sup>th</sup> <input checked="" type="checkbox"/> author  | DAVID E.      | BERGSTROM                                                                                                                              |
| 9 <sup>th</sup> <input checked="" type="checkbox"/> author  | ROSS L.       | LEVINE                                                                                                                                 |
| 10 <sup>th</sup> <input checked="" type="checkbox"/> author | REBEKKA K.    | SCHNEIDER                                                                                                                              |
| 11 <sup>th</sup> <input checked="" type="checkbox"/> author | JENNIFER J.   | TROWBRIDGE (CA)                                                                                                                        |
| <del>5<sup>th</sup> author</del>                            |               |                                                                                                                                        |
| <del>6<sup>th</sup> author</del>                            |               |                                                                                                                                        |
| <del>7<sup>th</sup> author</del>                            |               |                                                                                                                                        |

Please use an additional sheet if there are more than 7 authors.

## Change of authorship request form (pre-acceptance)

**Section 5: Author contribution, Acknowledgement and Disclosures.** Please use this section to provide a new disclosure statement and, if appropriate, acknowledge any contributors who have been removed as authors and ensure you state what contribution any new authors made (if applicable per the journal or book (series) policy). **Please ensure these are updated in your manuscript - after approval of the change(s) - as our production department will not transfer the information in this form to your manuscript.**

**New acknowledgements:**

**New Disclosures (financial and non-financial interests, funding):**

**New Author Contributions statement (if applicable per the journal policy):**

This work was supported by National Institutes of Health (NIH), National Cancer Institute (NCI) grant R21 CA184851-01 (J.T.), National Institute of Diabetes and Digestive and Kidney Diseases (NIDDK) grant R01 DK118072-01 (J.T.), NCI Cancer Core Grant P30 CA034196 and Eunice Kennedy Shriver National Institute of Child Health and Human Development (NICHD) T32 HD007065 (K.Y. and J.S.). This work was also supported by The V Foundation V Scholar award (J.T.) and grants from the Maine Cancer Foundation (J.T.). Additionally, this work is supported in part by NIH, NCI grant R35 CA197594-01A1 and NIH, Office of the Director grant U54 OD020355 (both to R.L.). K.Y. is supported by an American Society of Hematology (ASH) Scholar Award and the Pyewacket Fund at The Jackson Laboratory. L.M. is supported by a Leukemia & Lymphoma Society (LLS) Fellow Award. The authors acknowledge the Marie-Josée and Henry R. Kravis Center for Molecular Oncology, the Memorial Sloan Kettering Cancer Center (MSKCC) Bioinformatics Core, and the use of the Integrated Genomics Operation Core, funded by MSKCC Support Grant (NCI P30 CA008748). We thank Nicole Dean, Tara Murphy, Eraj Khokhar, Kai Cheng and Judy Morgan for technical help, experimental and laboratory support, Kevin Mills and members of the Trowbridge laboratory for helpful discussion and critical comments, and Will Schott for cell sorting.

R.L. is on the supervisory board of Qiagen and is a scientific advisor to Loxo, Imago, C4 Therapeutics and Isoplexis. He receives research support from and consulted for Celgene and Roche, research support from Prelude Therapeutics, and has consulted for Novartis and Gilead. He has received honoraria from Lilly and Amgen for invited lectures. All other authors have no conflicts-of-interest to disclose.

L.G., D.B. and J.T. designed and generated the mouse models. M.L., R.B., E.E., K.Y. and J.T. designed experiments. M.L., R.B., E.E., L.M. and K.Y. performed and analyzed experiments. R.S. analyzed and interpreted experiments. R.L. provided critical reagents. M.L., J.S. and J.T. wrote the manuscript. R.B., L.G., E.E., L.M., K.Y., D.B., R.L. and R.S. edited the manuscript.

State 'Not applicable' if there are no new authors.

## Change of authorship request form (pre-acceptance)

**Section 6: Declaration of agreement. All authors, unchanged, new and removed must sign this declaration.**

(NB: Please print the form, sign and return a scanned copy. Please note that signatures that have been inserted as an image file are acceptable as long as it is handwritten. Typed names in the signature box are unacceptable.) \* Please delete as appropriate. Delete all of the bold if you were on the original authorship list and are remaining as an author.

|                         | First name | Family name |                                                                                                                      | Signature                                                                             | Affiliated institute                   | Date    |
|-------------------------|------------|-------------|----------------------------------------------------------------------------------------------------------------------|---------------------------------------------------------------------------------------|----------------------------------------|---------|
| 1 <sup>st</sup> author  | MATTHEW    | LOBERG      | I agree to the proposed new authorship shown in section 4                                                            |    | THE JACKSON LABORATORY                 | 12/4/18 |
| 2 <sup>nd</sup> author  | REBECCA    | BELL        | I agree to the proposed new authorship shown in section 4                                                            |    | THE JACKSON LABORATORY                 | 12/4/18 |
| 3 <sup>rd</sup> author  | LESLIE     | GOODWIN     | I agree to the proposed new authorship shown in section 4                                                            |    | THE JACKSON LABORATORY                 | 12/5/18 |
| 4 <sup>th</sup> authors | ELIZABETH  | EUDY        | I agree to the proposed new authorship shown in section 4                                                            |    | THE JACKSON LABORATORY                 | 12/4/18 |
| 5 <sup>th</sup> author  | LINDE      | MILES       | I agree to the proposed new authorship shown in section 4 <b>and the addition of my name to the authorship list.</b> |    | MEMORIAL SLOAN KETTERING CANCER CENTER | 12/4/18 |
| 6 <sup>th</sup> author  | JENNIFER   | SANMIGUEL   | I agree to the proposed new authorship shown in section 4                                                            |  | THE JACKSON LABORATORY                 | 12/4/18 |
| 7 <sup>th</sup> author  | KIRA       | YOUNG       | I agree to the proposed new authorship shown in section 4                                                            |  | THE JACKSON LABORATORY                 | 12/5/18 |

Please use an additional sheet if there are more than 7 authors.



## Change of authorship request form (pre-acceptance)

**Section 6: Declaration of agreement. All authors, unchanged, new and removed *must* sign this declaration.**

**(NB: Please print the form, sign and return a scanned copy. Please note that signatures that have been inserted as an image file are acceptable as long as it is handwritten. Typed names in the signature box are unacceptable.) \* Please delete as appropriate. Delete all of the bold if you were on the original authorship list and are remaining as an author.**

|              | First name | Family name |                                                                                                                      | Signature                                                                           | Affiliated institute                   | Date    |
|--------------|------------|-------------|----------------------------------------------------------------------------------------------------------------------|-------------------------------------------------------------------------------------|----------------------------------------|---------|
| 8th author   | DAVID      | BERGSTROM   | I agree to the proposed new authorship shown in section 4                                                            |  | THE JACKSON LABORATORY                 | 12/4/18 |
| 9th author   | ROSS       | LEVINE      | I agree to the proposed new authorship shown in section 4 <b>and the addition of my name to the authorship list.</b> |  | MEMORIAL SLOAN KETTERING CANCER CENTER | 12/4/18 |
| 10th author  | REBEKKA    | SCHNEIDER   | I agree to the proposed new authorship shown in section 4                                                            |  | ERASMUS MC                             | 12/4/18 |
| 11th authors | JENNIFER   | TROWBRIDGE  | I agree to the proposed new authorship shown in section 4                                                            |  | THE JACKSON LABORATORY                 | 12/4/18 |
|              |            |             |                                                                                                                      |                                                                                     |                                        |         |
|              |            |             |                                                                                                                      |                                                                                     |                                        |         |
|              |            |             |                                                                                                                      |                                                                                     |                                        |         |

Please use an additional sheet if there are more than 7 authors.

## Change of authorship request form (pre-acceptance)

### Important information. Please read.

- Please return this form, fully completed, to Springer Nature. We will consider the information you have provided to decide whether to approve the proposed change in authorship. We may choose to contact your institution for more information or undertake a further investigation, if appropriate, before making a final decision.
- By signing this declaration, all authors guarantee that the order of the authors are in accordance with their scientific contribution, if applicable as different conventions apply per discipline, and that only authors have been added who made a meaningful contribution to the work.
- Please note, we cannot investigate or mediate any authorship disputes. If you are unable to obtain agreement from all authors (including those who you wish to be removed) you must refer the matter to your institution(s) for investigation. Please inform us if you need to do this.
- If you are not able to return a fully completed form within **30 days** of the date that it was sent to the author requesting the change, we may have to withdraw your manuscript. We cannot publish manuscripts where authorship has not been agreed by all authors (including those who have been removed).
- Incomplete forms will be rejected.
