# Supplementary material for: Sequentially inducible mouse models reveal that Npm1 mutation causes malignant transformation of Dnmt3a-mutant clonal hematopoiesis
Source: PubMed Central journal article supplement (PMC6609470; doi:10.1038/s41375-018-0368-6), 2019-01-28
Supplement: NIHMS1516722-supplement-4.pdf [file NIHMS1516722-supplement-4.pdf]

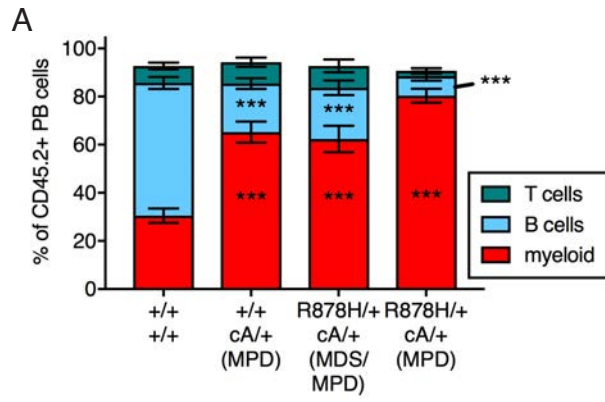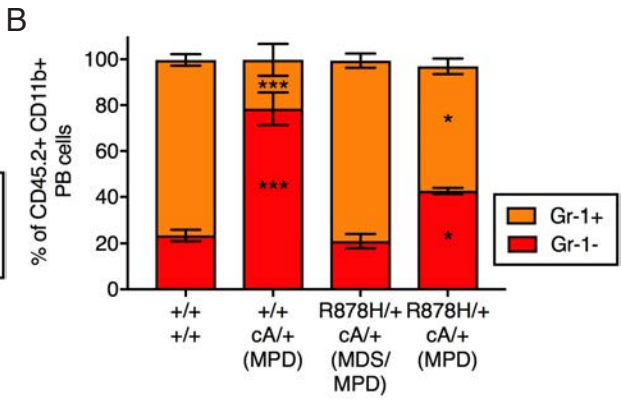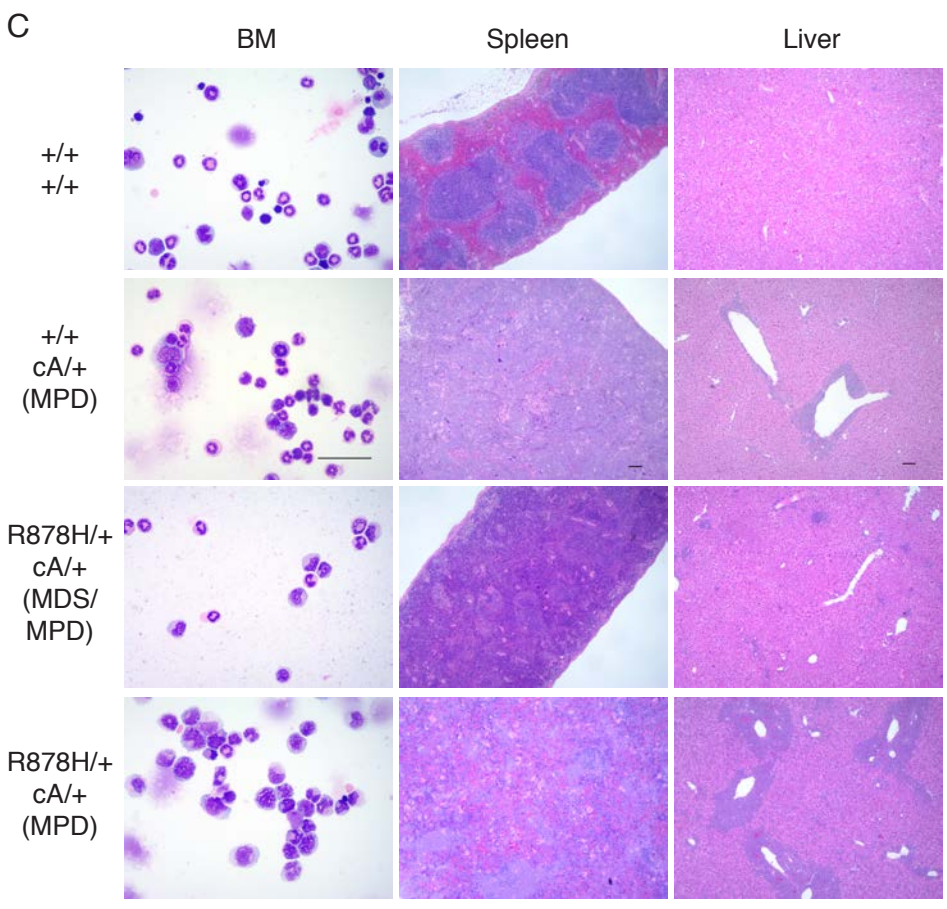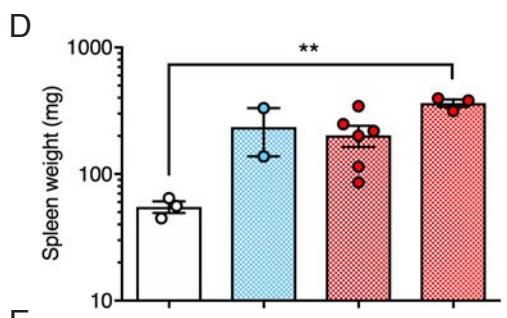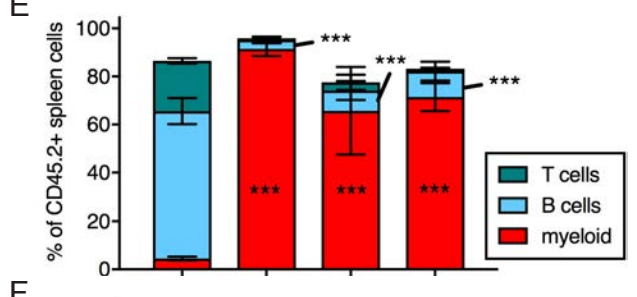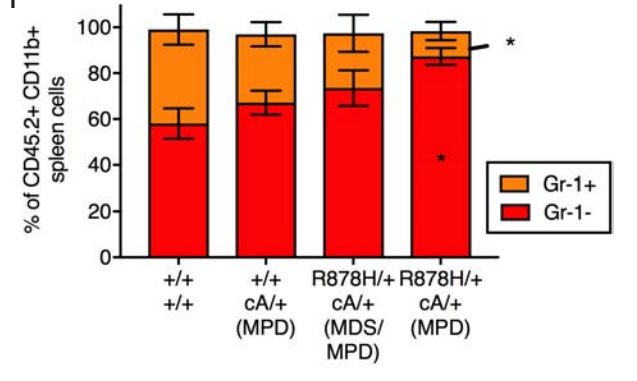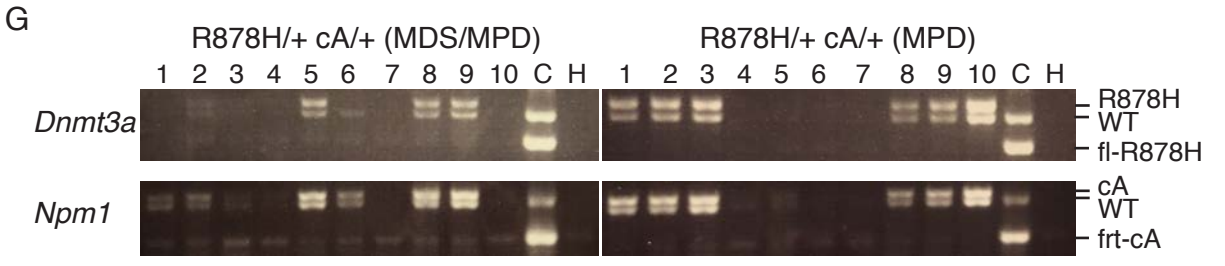

| Phenotype | Frequency of recombined clones |
|-----------|--------------------------------|
| MDS/MPD   | 82% (9/11)                     |
| MPD       | 100% (22/22)                   |
| AML       | 100% (15/15)                   |

**Figure S3. Characterization of *Dnmt3a*<sup>R878H/+</sup> *Npm1*<sup>cA/+</sup> MDS/MPD and MPD.** (A) Frequency of myeloid, B and T cells within the donor-derived CD45.2<sup>+</sup> fraction in PB and (B) Gr-1<sup>+</sup> and Gr-1<sup>-</sup> cells within donor-derived myeloid PB of moribund mice (control, *n* = 3; cA/+ MPD, *n* = 2; R878H/+ cA/+ MDS/MPD, *n* = 6; R878H/+ cA/+ MPD, *n* = 3). (C) Representative Giemsa-stained BM cytopsin (far left; 40X, scale bars are 40um) and H&E-stained spleen (center; 4X, scale bars are 100um) and liver sections (far right; 4X, scale bars are 100um) from moribund recipient mice transplanted with control, cA/+ only or R878H/+ cA/+ BM cells. (D) Spleen weights of moribund mice (control, *n* = 3; cA/+ MPD, *n* = 2; R878H/+ cA/+ MDS/MPD, *n* = 6; R878H/+ cA/+ MPD, *n* = 3). (E) Frequency of myeloid, B and T cells within the donor-derived CD45.2<sup>+</sup> fraction in PB and (F) Gr-1<sup>+</sup> and Gr-1<sup>-</sup> cells within donor-derived myeloid PB of moribund mice (control, *n* = 3; cA/+ MPD, *n* = 2; R878H/+ cA/+ MDS/MPD, *n* = 10; R878H/+ cA/+ MPD, *n* = 3). (G) Representative gel images and summary of PCR genotyping of single CFU colonies derived from BM of R878H/+ cA/+ mice showing wild-type (WT), non-recombined fl-R878H or frt-cA, and recombined R878H or cA alleles. C: non-recombined control, H: water only control.
